# Supplementary material for: Predicting specificity in bZIP coiled-coil protein interactions
Source: Springer Nature journal article supplement (doi:10.1186/gb-2004-5-2-r11), 2004-01-16
Supplement: Additional file 2 [file gb-2004-5-2-r11-s2.doc]

Supplemental Information: Base Optimized Weights

Below are the base optimized weights used in Fong, Keating and Singh.

A program that scores pairs of sequences using both the base optimized

weights and weights further constrained by the human bZIP data is

available at http://compbio.cs.princeton.edu/bzip/. As more

coiled-coil experimental and sequence information is made available,

the weights will change, and the corresponding bZIP partner prediction

program will be updated via our webpage.

We note that the weights given below do NOT correspond to energetic

favorability, and should not be interpreted as such. Instead, the

weights capture statistical features present in the coiled-coil

sequence data, as well as constraints derived from biophysical

experiments. The weights given below are not derived from human bZIP

data.

Each line below corresponds to one combination of interacting heptad

pairs and the residues at each heptad position. See the main text for

a more detailed description of which heptad pairs are included. The

positions are shown in column (1) and the residues at each of the two

positions, respectively, in columns (2) and (3). The weight is given

in column (5). Column (4) provides an index for each row, for use in

internal computations. Weights not listed have a value of 0.

Email: bzip@cs.princeton.edu

1 2 3 4 5

--------------------------

GE L L 0 -0.564593

GE L I 1 -0.358260

GE L V 2 -0.582637

GE L M 3 -0.150010

GE L Y 5 -0.210235

GE L G 6 -0.204056

GE L A 7 -0.448558

GE L K 8 -0.964114

GE L R 9 -0.160884

GE L H 10 0.201383

GE L E 11 0.556206

GE L D 12 0.333468

GE L Q 13 0.194887

GE L N 14 0.014901

GE L S 15 0.173158

GE L T 16 -0.354109

GE I L 20 0.378418

GE I M 23 0.047836

GE I G 26 -0.147021

GE I A 27 -0.321596

GE I K 28 0.427924

GE I E 31 0.707561

GE I D 32 0.423947

GE I Q 33 -0.199672

GE I S 35 -0.180904

GE I T 36 0.517522

GE V L 40 -0.211208

GE V I 41 -0.124738

GE V V 42 0.131306

GE V M 43 -0.190042

GE V Y 45 0.264580

GE V A 47 -0.030376

GE V K 48 -0.546599

GE V R 49 -0.516814

GE V H 50 -0.066105

GE V E 51 0.893755

GE V D 52 -0.426474

GE V Q 53 -0.445852

GE V N 54 -0.131493

GE V S 55 -0.289979

GE V T 56 -0.147379

GE M L 60 -0.339270

GE M I 61 -0.163083

GE M V 62 -0.016105

GE M G 66 -0.010214

GE M A 67 -0.066105

GE M K 68 -0.600024

GE M R 69 -0.794259

GE M E 71 0.970822

GE M D 72 -0.056425

GE M Q 73 -0.177501

GE M N 74 -0.313379

GE M S 75 -0.047673

GE M T 76 -0.048975

GE Y L 100 -0.050116

GE Y R 109 -0.107833

GE Y E 111 -0.099147

GE Y N 114 -0.050000

GE Y S 115 0.050853

GE G L 120 0.046049

GE G I 121 -0.084594

GE G V 122 -0.285567

GE G G 126 -0.044281

GE G A 127 -0.200938

GE G K 128 -0.167244

GE G R 129 -0.622018

GE G E 131 0.773889

GE G D 132 0.099268

GE G Q 133 -0.738033

GE G N 134 -0.041310

GE G S 135 -0.118796

GE G T 136 0.207058

GE A L 140 0.921027

GE A I 141 -0.347526

GE A V 142 -0.086674

GE A M 143 -0.175779

GE A Y 145 -0.152965

GE A G 146 -0.321895

GE A A 147 0.498791

GE A K 148 -0.033960

GE A R 149 -0.068561

GE A E 151 -0.881747

GE A D 152 0.018600

GE A Q 153 -0.145020

GE A N 154 -0.683384

GE A S 155 -0.571425

GE A T 156 -1.482645

GE K L 160 0.600468

GE K I 161 0.987300

GE K V 162 -0.095932

GE K M 163 0.913163

GE K F 164 -0.026803

GE K Y 165 -0.455289

GE K G 166 0.095679

GE K A 167 -0.116912

GE K K 168 -0.991403

GE K R 169 -1.259980

GE K E 171 0.029690

GE K D 172 0.306817

GE K Q 173 1.000028

GE K N 174 0.430475

GE K S 175 -0.037055

GE K T 176 0.999546

GE K C 177 -0.153918

GE R L 180 -0.312517

GE R I 181 0.510773

GE R V 182 0.608222

GE R M 183 -0.104983

GE R G 186 0.210227

GE R A 187 -0.231032

GE R K 188 -2.889088

GE R R 189 -2.922333

GE R H 190 0.511305

GE R E 191 1.688634

GE R D 192 0.999418

GE R Q 193 0.040429

GE R N 194 -0.461588

GE R S 195 -0.066124

GE R T 196 1.000091

GE H I 201 0.145566

GE H V 202 -0.047782

GE H K 208 0.552669

GE H E 211 -0.255348

GE H D 212 0.095016

GE H Q 213 -0.236743

GE H N 214 0.046735

GE H T 216 -0.136914

GE E L 220 -0.505171

GE E I 221 -0.309993

GE E V 222 0.722214

GE E M 223 -0.098202

GE E F 224 0.047836

GE E Y 225 0.080486

GE E G 226 0.008043

GE E A 227 -1.564468

GE E K 228 2.396279

GE E R 229 4.094972

GE E H 230 0.556103

GE E E 231 -5.574695

GE E D 232 -1.000010

GE E Q 233 -1.526627

GE E N 234 0.948024

GE E S 235 1.596141

GE E T 236 0.266031

GE E C 237 0.037336

GE D L 240 0.166981

GE D I 241 -0.814296

GE D V 242 -0.340769

GE D M 243 -0.678140

GE D Y 245 -0.451885

GE D G 246 0.203145

GE D A 247 0.824646

GE D K 248 0.880420

GE D R 249 1.338079

GE D H 250 -0.085434

GE D E 251 -1.585836

GE D D 252 -0.999369

GE D Q 253 0.524302

GE D N 254 0.999226

GE D S 255 0.999544

GE D T 256 -0.571673

GE Q L 260 -1.238701

GE Q I 261 0.029813

GE Q V 262 -0.315312

GE Q M 263 0.148729

GE Q F 264 -0.026803

GE Q G 266 0.844358

GE Q A 267 -1.759983

GE Q K 268 0.548645

GE Q R 269 0.544503

GE Q H 270 -0.240216

GE Q E 271 -0.438998

GE Q D 272 0.999742

GE Q Q 273 0.138300

GE Q N 274 0.567041

GE Q S 275 0.761441

GE Q T 276 0.211352

GE Q C 277 0.118678

GE N L 280 -0.139746

GE N I 281 0.306384

GE N V 282 -0.139028

GE N Y 285 0.070477

GE N G 286 0.047836

GE N A 287 -0.553336

GE N K 288 0.640268

GE N R 289 0.999576

GE N H 290 -0.152965

GE N E 291 1.000048

GE N D 292 0.833761

GE N Q 293 0.999565

GE N N 294 0.628574

GE N S 295 1.000463

GE N T 296 0.033123

GE S L 300 -0.033162

GE S I 301 -0.399201

GE S V 302 0.047836

GE S M 303 -0.115508

GE S G 306 -0.490003

GE S A 307 0.026492

GE S K 308 0.525324

GE S R 309 0.350683

GE S H 310 -0.121547

GE S E 311 -0.329494

GE S D 312 0.868455

GE S Q 313 0.401390

GE S N 314 0.993847

GE S S 315 0.629162

GE S T 316 0.999631

GE T L 320 0.969845

GE T I 321 -0.124873

GE T M 323 0.162179

GE T Y 325 -0.105409

GE T G 326 -0.041348

GE T A 327 0.315353

GE T K 328 -0.428508

GE T R 329 0.073113

GE T E 331 0.219183

GE T D 332 0.891332

GE T Q 333 0.906570

GE T N 334 0.390629

GE T S 335 0.999939

GE T T 336 0.896785

GE T C 337 -0.118678

GE C V 342 -0.421638

GE C E 351 0.094491

GE C Q 353 0.034358

GA L L 400 -0.514371

GA L I 401 -0.504134

GA L V 402 0.073793

GA L M 403 0.026352

GA L F 404 -0.314487

GA L Y 405 -0.372318

GA L G 406 0.263578

GA L A 407 -0.001372

GA L K 408 0.254721

GA L R 409 0.190157

GA L H 410 0.038986

GA L E 411 0.260388

GA L Q 413 -0.057726

GA L N 414 -0.569839

GA L S 415 0.174626

GA L T 416 -0.966936

GA L C 417 -0.150084

GA L W 418 0.244091

GA I L 420 -0.288782

GA I I 421 0.610216

GA I V 422 -0.346077

GA I M 423 -0.293414

GA I Y 425 -0.135695

GA I A 427 1.170248

GA I K 428 -0.124321

GA I R 429 0.530746

GA I Q 433 -0.097593

GA I N 434 0.436763

GA I T 436 -0.097593

GA I C 437 -0.052271

GA V L 440 -0.706805

GA V I 441 -1.023652

GA V V 442 -0.244563

GA V M 443 0.071009

GA V F 444 -0.227695

GA V Y 445 -0.275279

GA V A 447 -0.279642

GA V K 448 0.031655

GA V R 449 0.222546

GA V H 450 -0.210573

GA V E 451 0.263833

GA V Q 453 -0.271318

GA V N 454 -0.106203

GA V S 455 0.102085

GA V C 457 -0.178871

GA M L 460 -0.479383

GA M I 461 -1.253456

GA M V 462 -0.295417

GA M M 463 -0.008881

GA M F 464 -0.213854

GA M Y 465 -0.113083

GA M A 467 0.060274

GA M K 468 0.000069

GA M R 469 0.073030

GA M N 474 0.043727

GA M S 475 -0.084209

GA M C 477 0.626540

GA Y L 500 -0.050000

GA Y I 501 -0.007833

GA Y V 502 -0.099147

GA Y Y 505 -0.050116

GA Y A 507 -0.049147

GA G L 520 -0.804786

GA G I 521 -0.251285

GA G V 522 -0.302293

GA G M 523 0.240465

GA G F 524 -0.122770

GA G Y 525 -0.084594

GA G G 526 -0.089087

GA G A 527 -0.299359

GA G K 528 1.012610

GA G R 529 -0.323860

GA G H 530 0.067217

GA G N 534 -0.108774

GA G S 535 0.168865

GA G C 537 -0.278866

GA A L 540 -0.122766

GA A I 541 -1.253482

GA A V 542 -1.154154

GA A M 543 -0.387727

GA A F 544 -0.600711

GA A Y 545 -0.052946

GA A G 546 -0.104504

GA A A 547 0.341213

GA A K 548 0.996790

GA A R 549 1.792070

GA A H 550 0.138437

GA A Q 553 -0.075050

GA A N 554 -1.324183

GA A S 555 -0.305147

GA A T 556 -0.355634

GA A C 557 -0.406321

GA K L 560 -0.488963

GA K I 561 -1.011163

GA K V 562 -2.197865

GA K M 563 0.139542

GA K F 564 2.802589

GA K Y 565 1.350111

GA K G 566 -0.230013

GA K A 567 -1.666724

GA K K 568 -0.928677

GA K R 569 -1.458196

GA K H 570 -0.186201

GA K E 571 1.046491

GA K D 572 1.000000

GA K Q 573 1.053192

GA K N 574 0.723483

GA K S 575 0.280804

GA K T 576 1.000217

GA K C 577 0.036643

GA K W 578 -0.095242

GA R L 580 -0.360638

GA R I 581 0.123548

GA R V 582 -2.084083

GA R M 583 -0.239792

GA R F 584 0.109684

GA R Y 585 -0.351827

GA R G 586 -0.018290

GA R A 587 0.537374

GA R K 588 -1.672442

GA R R 589 -0.872010

GA R H 590 -0.227809

GA R E 591 -0.085440

GA R D 592 1.000000

GA R Q 593 0.948485

GA R N 594 -1.038749

GA R S 595 1.000294

GA R T 596 0.589187

GA R C 597 0.211524

GA H L 600 0.585433

GA H I 601 -0.281762

GA H V 602 -0.008884

GA H M 603 0.050324

GA H Y 605 0.053581

GA H A 607 -0.041563

GA H K 608 -0.146273

GA H N 614 -0.047782

GA H S 615 0.142689

GA H T 616 -0.041310

GA E L 620 1.209815

GA E I 621 1.137517

GA E V 622 -0.751830

GA E M 623 0.313438

GA E F 624 -0.789463

GA E Y 625 -0.682415

GA E G 626 0.244985

GA E A 627 1.220047

GA E K 628 -2.039868

GA E R 629 -1.322662

GA E H 630 -0.058392

GA E E 631 -1.000468

GA E D 632 -1.000000

GA E Q 633 0.161805

GA E N 634 0.195329

GA E S 635 0.468250

GA E T 636 0.728558

GA E C 637 -0.653205

GA E W 638 -0.047782

GA D L 640 -0.403338

GA D I 641 -0.522977

GA D V 642 -0.696242

GA D M 643 0.016085

GA D F 644 -0.095398

GA D Y 645 -0.817430

GA D A 647 0.318888

GA D K 648 0.325880

GA D R 649 0.092217

GA D H 650 -0.240948

GA D E 651 -1.000000

GA D D 652 -1.000000

GA D Q 653 0.698713

GA D N 654 0.736857

GA D S 655 0.922592

GA D T 656 0.746302

GA D C 657 0.914747

GA Q L 660 -0.202989

GA Q I 661 -0.996863

GA Q V 662 0.133799

GA Q M 663 -0.206317

GA Q F 664 -1.423915

GA Q Y 665 -0.309406

GA Q G 666 -0.238860

GA Q A 667 -1.234519

GA Q K 668 0.229647

GA Q R 669 0.999799

GA Q H 670 -0.107623

GA Q E 671 0.061840

GA Q D 672 1.000000

GA Q Q 673 0.999864

GA Q N 674 0.849138

GA Q S 675 0.918415

GA Q T 676 0.999975

GA Q C 677 -0.686512

GA Q W 678 -0.047782

GA N L 680 0.734120

GA N I 681 -0.606105

GA N V 682 0.294317

GA N M 683 0.204547

GA N F 684 -0.152965

GA N Y 685 0.177337

GA N G 686 0.241223

GA N A 687 -0.695803

GA N K 688 1.000145

GA N R 689 -0.036305

GA N H 690 0.034766

GA N E 691 0.731584

GA N D 692 1.000000

GA N Q 693 1.000667

GA N N 694 0.882235

GA N S 695 0.878235

GA N T 696 0.802139

GA N C 697 -0.195571

GA N W 698 -0.095242

GA S L 700 -0.360993

GA S I 701 -1.110584

GA S V 702 -0.818494

GA S M 703 -0.175543

GA S F 704 0.096133

GA S Y 705 0.002235

GA S G 706 -0.110237

GA S A 707 -1.144941

GA S K 708 0.921034

GA S R 709 0.999887

GA S H 710 -0.124738

GA S E 711 0.692532

GA S D 712 1.000000

GA S Q 713 0.853515

GA S N 714 0.573671

GA S S 715 1.000325

GA S T 716 1.000657

GA S C 717 -0.336698

GA T L 720 0.321549

GA T I 721 -0.616671

GA T V 722 -0.165172

GA T M 723 -0.067030

GA T F 724 -1.492743

GA T Y 725 -0.092906

GA T A 727 -1.143392

GA T K 728 1.000591

GA T R 729 0.799371

GA T H 730 0.220550

GA T E 731 0.654589

GA T D 732 1.000000

GA T Q 733 0.619129

GA T N 734 1.000125

GA T S 735 0.999646

GA T T 736 1.000000

GA T C 737 -0.048779

GA C D 752 -0.421638

GA C N 754 0.128849

DE L L 800 0.522796

DE L I 801 -0.332301

DE L V 802 -0.519222

DE L M 803 -0.260241

DE L F 804 0.021033

DE L Y 805 -0.053234

DE L G 806 -1.792585

DE L A 807 -0.083661

DE L K 808 -1.287799

DE L R 809 -0.726951

DE L H 810 0.403911

DE L E 811 1.059651

DE L D 812 -1.175934

DE L Q 813 -1.151331

DE L N 814 -0.459569

DE L S 815 -0.881781

DE L T 816 0.620711

DE L C 817 -0.023493

DE I L 820 -0.286910

DE I I 821 0.042284

DE I V 822 0.104503

DE I Y 825 -0.131306

DE I G 826 -0.319159

DE I A 827 -0.117406

DE I K 828 -0.515891

DE I R 829 0.439690

DE I H 830 0.195890

DE I E 831 -0.926784

DE I D 832 -0.147900

DE I Q 833 1.264993

DE I N 834 -0.161696

DE I S 835 -0.004287

DE I T 836 0.320321

DE V L 840 -0.099533

DE V I 841 -0.578178

DE V M 843 -0.349745

DE V Y 845 -0.210235

DE V G 846 0.293244

DE V A 847 0.537625

DE V K 848 -0.751506

DE V R 849 -0.010709

DE V H 850 0.131306

DE V E 851 -0.152870

DE V D 852 0.088676

DE V Q 853 -0.481396

DE V N 854 -0.008315

DE V S 855 0.118450

DE V T 856 0.011277

DE M L 860 -0.191590

DE M I 861 -0.417612

DE M V 862 -0.349849

DE M G 866 -0.014548

DE M A 867 0.990838

DE M K 868 -0.295582

DE M R 869 -0.197194

DE M H 870 0.192680

DE M E 871 -0.169278

DE M D 872 0.402839

DE M Q 873 0.651849

DE M N 874 -0.332442

DE M S 875 0.139920

DE M T 876 -0.476679

DE F L 880 -0.258280

DE F I 881 -0.404029

DE F V 882 -0.138865

DE F M 883 -0.096383

DE F Y 885 -0.258374

DE F G 886 -0.117851

DE F A 887 0.235831

DE F K 888 0.168232

DE F R 889 -0.030083

DE F E 891 -0.564685

DE F D 892 1.470798

DE F Q 893 -0.452786

DE F N 894 -0.470049

DE F S 895 -0.712916

DE F T 896 -0.200825

DE Y L 900 0.142328

DE Y V 902 -0.441186

DE Y Y 905 0.326824

DE Y G 906 -0.340463

DE Y A 907 -0.279968

DE Y K 908 -0.102717

DE Y R 909 0.384164

DE Y E 911 -1.249289

DE Y D 912 -0.327554

DE Y Q 913 0.414716

DE Y N 914 -0.962751

DE Y S 915 1.169368

DE Y T 916 -1.219457

DE G L 920 -0.049147

DE G G 926 1.170349

DE G A 927 -0.060881

DE G K 928 -0.109109

DE G R 929 -0.066443

DE G E 931 -0.287817

DE G D 932 -0.146486

DE G Q 933 -2.014887

DE G N 934 -0.127000

DE G T 936 -0.244079

DE A L 940 -0.402494

DE A I 941 0.526046

DE A V 942 0.560119

DE A M 943 -0.403651

DE A F 944 -0.026803

DE A Y 945 -0.154456

DE A G 946 -0.501539

DE A A 947 -1.293799

DE A K 948 -2.084723

DE A R 949 -1.891315

DE A H 950 0.059712

DE A E 951 -1.104238

DE A D 952 0.134299

DE A Q 953 0.253238

DE A N 954 0.316634

DE A S 955 -1.557774

DE A T 956 0.007571

DE A C 957 -0.008496

DE K L 960 -0.115508

DE K I 961 -0.066451

DE K V 962 -0.046127

DE K G 966 -0.095131

DE K K 968 -1.000092

DE K R 969 -1.000534

DE K E 971 1.654832

DE K D 972 0.999965

DE K Q 973 -1.547351

DE K N 974 0.942190

DE K S 975 1.000000

DE K T 976 0.435793

DE R L 980 -0.153111

DE R I 981 -0.059339

DE R K 988 -0.991559

DE R R 989 -1.000000

DE R E 991 1.000588

DE R D 992 1.000000

DE R Q 993 -1.327691

DE R N 994 0.846889

DE R S 995 1.000000

DE R T 996 0.939807

DE H L 1000 0.065789

DE H I 1001 0.041348

DE H V 1002 -0.048975

DE H G 1006 0.171666

DE H A 1007 -1.740188

DE H K 1008 -0.478715

DE H R 1009 0.002567

DE H E 1011 -0.049646

DE H D 1012 0.178242

DE H Q 1013 -0.341254

DE H N 1014 -0.775796

DE H S 1015 0.183168

DE H T 1016 -0.295306

DE H C 1017 -0.118678

DE E L 1020 -0.230343

DE E I 1021 0.761161

DE E V 1022 -0.100772

DE E M 1023 1.032052

DE E Y 1025 -0.516117

DE E G 1026 0.039990

DE E A 1027 0.502153

DE E K 1028 0.999269

DE E R 1029 -0.343782

DE E H 1030 -0.192765

DE E E 1031 -1.631040

DE E D 1032 -1.000125

DE E Q 1033 0.713771

DE E N 1034 0.297565

DE E S 1035 0.999922

DE E T 1036 0.683642

DE E C 1037 -0.084594

DE D L 1040 -0.158827

DE D V 1042 -0.337324

DE D A 1047 -0.088493

DE D K 1048 0.881987

DE D R 1049 1.307879

DE D E 1051 -0.975235

DE D D 1052 -1.000054

DE D Q 1053 -0.710412

DE D N 1054 0.939604

DE D S 1055 0.943575

DE D T 1056 0.489646

DE Q L 1060 -0.365335

DE Q K 1068 0.999731

DE Q R 1069 0.556797

DE Q E 1071 1.000227

DE Q D 1072 0.999203

DE Q Q 1073 0.367252

DE Q N 1074 0.969010

DE Q S 1075 1.000419

DE Q T 1076 0.906875

DE N L 1080 0.019923

DE N I 1081 -0.065474

DE N M 1083 0.217844

DE N G 1086 0.172981

DE N A 1087 0.190123

DE N K 1088 -0.391321

DE N R 1089 0.895589

DE N E 1091 0.829076

DE N D 1092 0.952327

DE N Q 1093 -0.071602

DE N N 1094 1.000528

DE N S 1095 0.695605

DE N T 1096 0.832916

DE S L 1100 0.527763

DE S I 1101 -0.152658

DE S V 1102 -0.025441

DE S M 1103 -0.139303

DE S G 1106 -0.105908

DE S A 1107 -0.148295

DE S K 1108 0.440928

DE S R 1109 -0.823886

DE S E 1111 0.999484

DE S D 1112 0.448313

DE S Q 1113 0.931219

DE S N 1114 -0.146960

DE S S 1115 0.408731

DE S T 1116 0.265274

DE S C 1117 0.118678

DE T L 1120 0.659756

DE T I 1121 -0.337630

DE T V 1122 0.026247

DE T M 1123 -0.174847

DE T Y 1125 0.115470

DE T G 1126 0.167915

DE T A 1127 0.031371

DE T K 1128 0.889503

DE T R 1129 0.862603

DE T H 1130 -0.139131

DE T E 1131 0.590298

DE T D 1132 0.596251

DE T Q 1133 0.864972

DE T N 1134 0.904762

DE T S 1135 1.000138

DE T T 1136 0.546453

DE C L 1140 0.041348

DE C A 1147 -2.500905

DE C K 1148 0.922928

DE C R 1149 0.428535

DE C E 1151 -3.192546

DE C Q 1153 2.967322

DE C N 1154 -0.011979

DE C T 1156 0.098685

DE W L 1160 -0.150010

DE W M 1163 -0.093659

DE W A 1167 -0.097593

DE W K 1168 0.908513

DE W R 1169 -0.331460

DE W D 1172 -0.572959

DE W Q 1173 -0.796606

DE W N 1174 -0.018661

DE W S 1175 -0.066908

DE P L 1180 -0.111803

DE P I 1181 -0.060829

DE P V 1182 -0.008496

DE P R 1189 -0.084594

AD L L 1200 -1.829013

AD L I 1201 -1.140990

AD L V 1202 -0.398298

AD L M 1203 -0.577021

AD L F 1204 0.413635

AD L Y 1205 -0.796178

AD L G 1206 0.294503

AD L A 1207 1.086334

AD L K 1208 0.786523

AD L R 1209 -0.442219

AD L H 1210 0.151834

AD L E 1211 2.607585

AD L D 1212 -0.528222

AD L Q 1213 -0.776137

AD L N 1214 -1.051062

AD L S 1215 0.177808

AD L T 1216 1.349209

AD L C 1217 0.241049

AD L W 1218 0.135798

AD L P 1219 -0.120299

AD I L 1220 1.768470

AD I I 1221 1.580988

AD I V 1222 1.257163

AD I M 1223 0.813279

AD I F 1224 0.087164

AD I Y 1225 0.070271

AD I G 1226 -1.982860

AD I A 1227 -0.962072

AD I K 1228 -0.832877

AD I R 1229 -2.090336

AD I H 1230 -0.488148

AD I E 1231 -2.700512

AD I D 1232 -1.302963

AD I Q 1233 -0.075246

AD I N 1234 -0.201764

AD I S 1235 -1.690669

AD I T 1236 -1.841817

AD I C 1237 -0.041348

AD I W 1238 0.050481

AD V L 1240 1.859550

AD V I 1241 0.059172

AD V V 1242 -1.138863

AD V M 1243 0.621831

AD V F 1244 -1.420948

AD V Y 1245 -0.657504

AD V G 1246 -0.149864

AD V A 1247 -0.790903

AD V K 1248 -0.123919

AD V R 1249 1.564997

AD V H 1250 0.007886

AD V E 1251 -0.927713

AD V D 1252 -1.079317

AD V Q 1253 -0.352136

AD V N 1254 -1.533476

AD V S 1255 -1.812949

AD V T 1256 -1.028138

AD V C 1257 -1.377908

AD V W 1258 -0.164107

AD M L 1260 1.181478

AD M I 1261 0.872409

AD M V 1262 -0.381868

AD M M 1263 -0.135051

AD M F 1264 0.026218

AD M Y 1265 0.085763

AD M A 1267 -0.768134

AD M K 1268 -0.058471

AD M H 1270 0.211310

AD M E 1271 0.022936

AD M D 1272 -0.243382

AD M Q 1273 0.336083

AD M N 1274 -0.047481

AD M S 1275 -0.405310

AD M T 1276 0.236835

AD M W 1278 -0.045644

AD F L 1280 -0.046630

AD F I 1281 -0.098699

AD F V 1282 -0.068849

AD F M 1283 -0.050116

AD F F 1284 -0.465472

AD F Y 1285 -0.445882

AD F A 1287 -0.642170

AD F R 1289 0.118565

AD F H 1290 -0.080064

AD F E 1291 -0.004826

AD F N 1294 -0.374654

AD F S 1295 -0.070357

AD F T 1296 -0.020411

AD F C 1297 -0.056425

AD Y L 1300 -0.982419

AD Y I 1301 -0.298928

AD Y V 1302 0.134868

AD Y M 1303 -0.229089

AD Y F 1304 -0.628348

AD Y Y 1305 -0.072140

AD Y G 1306 0.220400

AD Y A 1307 -1.052006

AD Y K 1308 0.083047

AD Y E 1311 0.717247

AD Y D 1312 -0.088493

AD Y Q 1313 0.129099

AD Y S 1315 0.771378

AD Y T 1316 0.117030

AD Y P 1319 -0.060829

AD G L 1320 -0.273964

AD G F 1324 0.219851

AD G Y 1325 -0.089087

AD G K 1328 -0.018290

AD G R 1329 0.157866

AD G E 1331 -0.147856

AD G D 1332 -0.085749

AD G Q 1333 0.047836

AD G T 1336 0.148188

AD A L 1340 -1.255101

AD A I 1341 -0.666010

AD A V 1342 -0.793100

AD A M 1343 -0.140861

AD A F 1344 0.286659

AD A Y 1345 0.181396

AD A G 1346 -0.077056

AD A A 1347 -0.350323

AD A K 1348 -0.046127

AD A H 1350 -0.047301

AD A E 1351 0.269015

AD A D 1352 0.267007

AD A Q 1353 -0.069836

AD A N 1354 0.846658

AD A S 1355 0.015222

AD A T 1356 0.057143

AD A C 1357 -0.008881

AD A W 1358 -0.150010

AD K L 1360 -1.296520

AD K I 1361 0.096084

AD K V 1362 -0.377317

AD K M 1363 0.666770

AD K F 1364 0.142353

AD K Y 1365 0.636739

AD K G 1366 -0.148204

AD K A 1367 -0.510896

AD K K 1368 -0.606849

AD K R 1369 -0.604672

AD K E 1371 -1.452628

AD K Q 1373 0.321054

AD K N 1374 0.105000

AD K S 1375 -0.100150

AD K T 1376 0.076640

AD K W 1378 -0.200262

AD R L 1380 -0.631837

AD R I 1381 -0.351555

AD R V 1382 0.853131

AD R M 1383 0.265790

AD R F 1384 -0.317403

AD R Y 1385 -0.554662

AD R A 1387 -0.049366

AD R K 1388 -0.277905

AD R R 1389 -0.110237

AD R E 1391 -1.446477

AD R D 1392 -0.068116

AD R Q 1393 -0.158469

AD R N 1394 -0.024126

AD R S 1395 -0.199525

AD R T 1396 -0.250300

AD H L 1400 0.064453

AD H I 1401 -0.115508

AD H M 1403 0.076193

AD H F 1404 -0.085186

AD H G 1406 -0.102740

AD H A 1407 0.221754

AD H K 1408 -0.115508

AD H E 1411 -0.018778

AD H D 1412 -0.002442

AD H S 1415 -0.105182

AD H T 1416 0.183639

AD E L 1420 -1.549915

AD E I 1421 -0.167755

AD E V 1422 -0.047673

AD E F 1424 0.236289

AD E Y 1425 0.863738

AD E A 1427 -0.791596

AD E K 1428 -0.139528

AD E E 1431 -0.042904

AD E Q 1433 0.179329

AD E N 1434 0.130194

AD E S 1435 -0.130408

AD D A 1447 -0.421638

AD D H 1450 0.034358

AD Q L 1460 -0.898002

AD Q I 1461 0.038294

AD Q M 1463 -0.165146

AD Q F 1464 1.314552

AD Q Y 1465 -0.149665

AD Q G 1466 -0.008610

AD Q A 1467 -0.199767

AD Q H 1470 -0.030699

AD Q S 1475 -0.206314

AD Q T 1476 -0.217466

AD Q W 1478 -0.320209

AD N L 1480 0.101251

AD N I 1481 0.103363

AD N V 1482 -0.332007

AD N M 1483 -0.173006

AD N F 1484 -0.133303

AD N Y 1485 -0.382808

AD N A 1487 -1.823013

AD N K 1488 0.007282

AD N H 1490 -1.869648

AD N E 1491 -0.535633

AD N D 1492 -0.258131

AD N Q 1493 -0.033442

AD N S 1495 -0.075441

AD N T 1496 -0.140894

AD S L 1500 0.517228

AD S I 1501 -0.350085

AD S V 1502 0.143349

AD S M 1503 -0.156384

AD S F 1504 -0.328324

AD S Y 1505 0.010316

AD S A 1507 -0.639865

AD S E 1511 -0.223854

AD S D 1512 0.606999

AD S Q 1513 -0.111803

AD S N 1514 0.346692

AD S S 1515 -0.617702

AD S T 1516 -0.168046

AD S W 1518 -0.018661

AD T L 1520 -0.573614

AD T I 1521 -0.095920

AD T V 1522 0.047836

AD T M 1523 -0.000105

AD T F 1524 -0.146486

AD T Y 1525 -0.211336

AD T G 1526 -0.146486

AD T A 1527 -0.371720

AD T E 1531 -0.048984

AD T D 1532 0.638400

AD T N 1534 0.197030

AD T S 1535 -0.344517

AD T T 1536 -0.085749

AD T W 1538 0.154076

AD C L 1540 0.645473

AD C V 1542 -0.086147

AD C M 1543 -0.139515

AD C F 1544 -0.380997

AD C Y 1545 0.374779

AD C A 1547 -0.160388

AD C E 1551 -0.219612

AD C D 1552 0.356055

AD C Q 1553 -0.601574

AD C N 1554 -0.003098

AD C S 1555 -0.012926

AD C T 1556 -0.128563

AD C W 1558 -0.660803

AD W L 1560 -0.095564

AD W I 1561 0.065097

AD W M 1563 -0.095242

AD W Y 1565 0.178994

AD W T 1576 -0.095242

DA L L 1600 2.042391

DA L I 1601 2.159945

DA L V 1602 1.746963

DA L M 1603 0.208392

DA L F 1604 -1.051388

DA L Y 1605 -1.239132

DA L G 1606 -0.216175

DA L A 1607 -2.539037

DA L K 1608 -1.402648

DA L R 1609 -3.597590

DA L H 1610 -0.146607

DA L E 1611 0.037635

DA L Q 1613 -0.399332

DA L N 1614 -2.322256

DA L S 1615 -0.804760

DA L T 1616 0.398086

DA L C 1617 -1.006422

DA L W 1618 -0.190806

DA I L 1620 1.436695

DA I I 1621 -1.066951

DA I V 1622 -0.142267

DA I M 1623 -0.387772

DA I F 1624 -0.339562

DA I Y 1625 -0.557221

DA I A 1627 -0.336627

DA I K 1628 0.516114

DA I R 1629 -0.183348

DA I E 1631 -0.110432

DA I N 1634 -0.167779

DA I S 1635 -0.031807

DA I C 1637 -0.087210

DA V L 1640 -1.227324

DA V I 1641 -1.250327

DA V V 1642 0.083750

DA V M 1643 0.224073

DA V F 1644 0.399334

DA V Y 1645 -0.263502

DA V A 1647 0.274435

DA V K 1648 0.336954

DA V R 1649 0.379473

DA V H 1650 0.015825

DA V E 1651 -0.175843

DA V Q 1653 -0.026803

DA V N 1654 0.889055

DA V S 1655 -0.224295

DA V C 1657 0.157683

DA M L 1660 0.545641

DA M I 1661 -0.646517

DA M V 1662 1.394798

DA M M 1663 0.303412

DA M F 1664 -0.330659

DA M Y 1665 0.006209

DA M A 1667 -0.612812

DA M K 1668 -0.430961

DA M R 1669 -0.404983

DA M H 1670 -0.038986

DA M Q 1673 0.251669

DA M N 1674 -0.339250

DA M S 1675 0.168523

DA M T 1676 -0.232171

DA M C 1677 -0.109930

DA F L 1680 -0.219717

DA F I 1681 0.171546

DA F V 1682 1.083413

DA F M 1683 0.654877

DA F F 1684 0.098316

DA F Y 1685 0.389679

DA F G 1686 -0.124738

DA F A 1687 -0.774776

DA F K 1688 -0.422658

DA F R 1689 -0.453670

DA F H 1690 -0.172054

DA F E 1691 -0.136644

DA F Q 1693 -0.366902

DA F N 1694 -0.985705

DA F S 1695 -0.137095

DA F T 1696 -0.027228

DA F C 1697 -0.406915

DA Y L 1700 -0.688027

DA Y I 1701 0.131447

DA Y V 1702 -0.206871

DA Y M 1703 -0.294096

DA Y Y 1705 0.180056

DA Y A 1707 1.514311

DA Y K 1708 -0.287961

DA Y R 1709 -0.520824

DA Y H 1710 -0.089481

DA Y E 1711 -0.034110

DA Y N 1714 -0.828722

DA Y S 1715 -0.698762

DA Y T 1716 -0.186318

DA Y C 1717 -0.386725

DA G L 1720 -0.288305

DA G I 1721 -0.072064

DA G V 1722 -1.415890

DA G K 1728 -0.150631

DA G R 1729 -0.146486

DA G N 1734 -0.018661

DA G T 1736 0.251669

DA G C 1737 -0.047782

DA A L 1740 -0.522815

DA A I 1741 -2.515949

DA A V 1742 -0.391225

DA A M 1743 -0.648872

DA A F 1744 -1.443765

DA A Y 1745 -0.731765

DA A A 1747 3.107031

DA A K 1748 -0.471656

DA A R 1749 -0.991634

DA A H 1750 -0.429270

DA A E 1751 -1.341163

DA A Q 1753 -0.056933

DA A N 1754 -1.635070

DA A S 1755 0.489251

DA A T 1756 0.003989

DA A C 1757 0.654140

DA A W 1758 0.178994

DA K L 1760 0.232692

DA K I 1761 0.293969

DA K V 1762 -0.730678

DA K M 1763 -0.079589

DA K F 1764 -0.056425

DA K Y 1765 0.219851

DA K A 1767 -0.345377

DA K K 1768 -0.552539

DA K N 1774 -0.237553

DA K S 1775 -0.056425

DA K T 1776 -0.024126

DA R L 1780 -0.080690

DA R V 1782 -2.209014

DA R K 1788 -0.119532

DA R R 1789 -0.228915

DA R C 1797 0.118678

DA H L 1800 -0.202830

DA H I 1801 -0.701236

DA H V 1802 -0.711795

DA H M 1803 -0.004779

DA H F 1804 0.065789

DA H A 1807 -1.567594

DA H T 1816 -0.083333

DA E L 1820 -1.859706

DA E I 1821 -1.584182

DA E V 1822 -2.661644

DA E M 1823 -0.331420

DA E F 1824 -0.501553

DA E Y 1825 -0.279940

DA E G 1826 0.475673

DA E A 1827 -0.554381

DA E K 1828 0.616818

DA E R 1829 2.242927

DA E H 1830 0.045814

DA E E 1831 0.263833

DA E N 1834 0.627580

DA E S 1835 0.528189

DA E T 1836 -0.216801

DA E C 1837 -0.809274

DA D L 1840 -0.096578

DA D I 1841 0.281893

DA D V 1842 -1.095515

DA D M 1843 0.152657

DA D Y 1845 -0.029235

DA D G 1846 -0.000737

DA D A 1847 -0.462855

DA D R 1849 -0.150603

DA D H 1850 0.076193

DA D Q 1853 0.302225

DA D N 1854 -0.070335

DA D S 1855 -0.311929

DA D T 1856 -0.197861

DA D C 1857 -0.185674

DA Q L 1860 0.249796

DA Q I 1861 -0.155868

DA Q V 1862 0.167356

DA Q M 1863 -0.094385

DA Q Y 1865 -0.131933

DA Q G 1866 -0.026803

DA Q A 1867 -0.215797

DA Q K 1868 -0.175907

DA Q R 1869 0.125000

DA Q E 1871 0.065097

DA Q N 1874 0.047836

DA Q C 1877 0.038986

DA N L 1880 0.000423

DA N I 1881 -0.937192

DA N V 1882 -1.303988

DA N M 1883 -0.318685

DA N F 1884 0.690647

DA N Y 1885 0.302225

DA N A 1887 -0.749126

DA N K 1888 0.297431

DA N Q 1893 0.065097

DA N S 1895 -0.386316

DA N T 1896 -0.085795

DA N C 1897 0.057085

DA N W 1898 0.065097

DA S L 1900 -0.706496

DA S I 1901 -1.329867

DA S V 1902 -1.816379

DA S M 1903 0.270742

DA S Y 1905 -0.205480

DA S A 1907 0.340801

DA S K 1908 -1.024130

DA S R 1909 0.769787

DA S E 1911 -0.000214

DA S Q 1913 -0.258774

DA S N 1914 -0.240250

DA S S 1915 0.267219

DA S T 1916 -0.174148

DA S C 1917 0.849868

DA T L 1920 -0.251494

DA T I 1921 -0.160143

DA T V 1922 -0.479085

DA T M 1923 0.028505

DA T F 1924 0.043676

DA T Y 1925 0.175822

DA T G 1926 -0.148426

DA T A 1927 0.016457

DA T K 1928 0.013100

DA T R 1929 0.346805

DA T H 1930 -0.018778

DA T Q 1933 -0.203710

DA T N 1934 -0.358016

DA T S 1935 -0.003098

DA T C 1937 -0.126879

DA T W 1938 -0.095242

DA C L 1940 -0.169653

DA C I 1941 -0.041348

DA C V 1942 -0.008881

DA C A 1947 -0.003098

DA C K 1948 0.041348

DA C H 1950 0.101015

DA C Q 1953 0.098685

DA W L 1960 -0.464149

DA W I 1961 -0.145840

DA W V 1962 0.034654

DA W Y 1965 0.409614

DA W Q 1973 -0.261360

DA W S 1975 -0.252750

DA W T 1976 -0.146486

DA W C 1977 0.092647

DA P L 1980 -0.084594

DA P R 1989 -0.069324

AA L L 2000 2.366131

AA L I 2001 1.851050

AA L V 2002 1.552153

AA L A 2007 2.261725

AA L K 2008 0.547482

AA L R 2009 1.275749

AA L Q 2013 0.065097

AA L N 2014 -3.390274

AA L S 2015 0.232496

AA I I 2021 1.036090

AA I V 2022 0.976694

AA I M 2023 0.382827

AA I F 2024 0.154456

AA I A 2027 2.114396

AA I K 2028 1.448363

AA I R 2029 2.259134

AA I N 2034 -6.227810

AA I S 2035 0.118678

AA I T 2036 -0.270717

AA V V 2042 0.295049

AA V M 2043 0.041348

AA V A 2047 0.832226

AA V K 2048 0.232715

AA V R 2049 0.982726

AA V N 2054 -5.739865

AA V T 2056 -0.722277

AA M M 2063 0.570412

AA M T 2076 -0.451561

AA F F 2084 0.035720

AA Y Y 2105 -0.019493

AA Y H 2110 0.038986

AA A A 2147 -1.909530

AA A K 2148 -2.943046

AA A R 2149 -2.311174

AA A N 2154 1.869403

AA K K 2168 -2.259576

AA K R 2169 0.115470

AA K N 2174 -0.728757

AA K C 2177 0.038986

AA R R 2189 -2.252587

AA R N 2194 -0.000473

AA R C 2197 0.118678

AA H H 2210 -0.019493

AA E E 2231 0.101805

AA D D 2252 -0.210818

AA D N 2254 0.034358

AA Q Q 2273 -0.210818

AA Q N 2274 0.034358

AA Q W 2278 0.065097

AA N N 2294 4.150945

AA S S 2315 0.117437

AA T T 2336 0.926628

AA C C 2357 -0.078832

DD L L 2400 4.098296

DD L I 2401 0.863343

DD L V 2402 0.402788

DD L M 2403 0.273134

DD L A 2407 0.483136

DD L K 2408 0.232496

DD L R 2409 -0.068734

DD L T 2416 0.131306

DD I I 2421 0.636432

DD I Q 2433 0.038986

DD V V 2442 -0.310657

DD V M 2443 0.115470

DD V A 2447 0.038986

DD M M 2463 0.784309

DD M A 2467 0.038986

DD F F 2484 -0.026179

DD Y Y 2505 0.850379

DD G G 2526 -1.003763

DD A A 2547 -1.489617

DD A H 2550 0.034358

DD A S 2555 0.131306

DD A T 2556 0.115470

DD K K 2568 -0.509897

DD R R 2589 -0.572759

DD R T 2596 0.118678

DD H H 2610 -1.069683

DD H N 2614 0.080334

DD H S 2615 0.118678

DD H T 2616 0.041348

DD E E 2631 -1.176697

DD D D 2652 -0.511735

DD Q Q 2673 0.026883

DD Q S 2675 0.065097

DD Q C 2677 0.041348

DD N N 2694 -0.535452

DD N S 2695 0.131306

DD S S 2715 -1.577791

DD S T 2716 0.038986

DD T T 2736 -0.781128

DD T C 2737 0.118678

DD C C 2757 -0.712349

DD W W 2778 -0.206314
